# Supplementary material for: Effects of G-Quadruplex-Binding Plant Secondary Metabolites on c-MYC Expression
Source: MDPI journal article supplement (doi:10.3390/ijms23169209), 2022-08-16

## **Effects of G-quadruplex-binding plant secondary metabolites on c-MYC expression**

Roman G. Zenkov <sup>1\*</sup>, Kirill I. Kirsanov<sup>1,2</sup>, Anna M. Ogloblina<sup>1</sup>, Olga A. Vlasova<sup>1</sup>, Denis S. Naberezhnov<sup>1</sup>, Natalia Y. Karpechenko<sup>1,3</sup>, Timur I. Fetisov<sup>1</sup>, Ekaterina A. Lesovaya<sup>1,4</sup>, Gennady A. Belitsky<sup>1</sup>, Nina G. Dolinnaya<sup>5</sup>, Marianna G. Yakubovskaya<sup>1</sup>

<sup>1</sup> N. N. Blokhin Russian Cancer Research Center, 24 Kashirskoe shosse, Moscow 115478, Russia;

<sup>2</sup> RUDN University, 6 Miklukho-Maklaya St., Moscow 117198, Russia

<sup>3</sup> Department of Medicinal Chemistry and Toxicology, Pirogov Russian National Research Medical University, 1 Ostrovityanova st., Moscow 117997, Russia

<sup>4</sup> I.P. Pavlov Ryazan State Medical University, 9 Vysokovolt'naya st., Ryazan 390026, Russia

<sup>5</sup> Department of Chemistry, Lomonosov Moscow State University, Leninskie Gory 1, 119991 Moscow, Russia

\*e-mail: r-zenkov@mail.ru

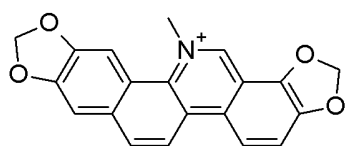

Sanguinarine

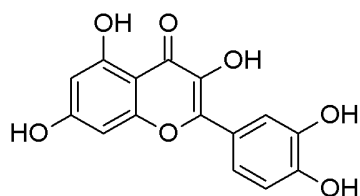

Quercetin

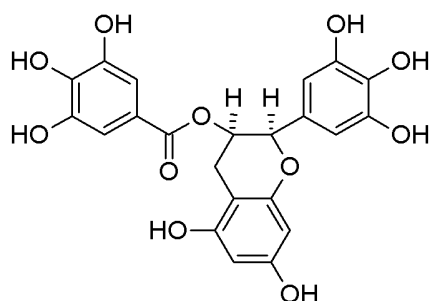

EGCG

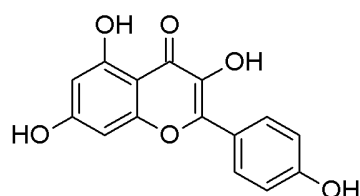

Kaempferol

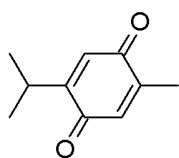

Thymoquinone

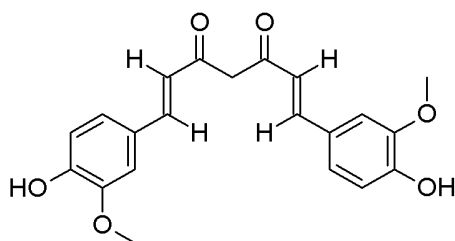

Curcumin

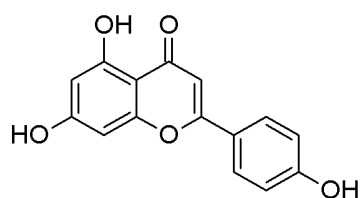

Apigenin

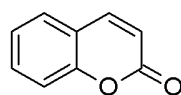

Coumarin

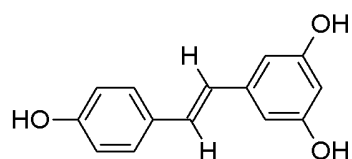

Resveratrol

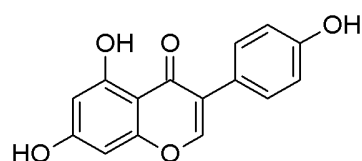

Genistein

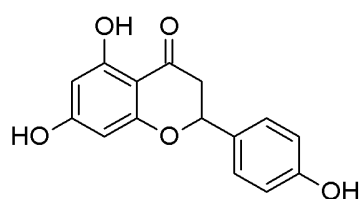

Naringenin

**Figure S1.** Structural formulae of plant secondary metabolites.

**Table S1.** IC<sub>50</sub>, IC<sub>20</sub> and applied nontoxic concentrations of PSMs in cancer and immortalized cell lines,  $\mu$ M.

| Polyphenol   | Cell viability         | Cell line       |                 |                 |                 |
|--------------|------------------------|-----------------|-----------------|-----------------|-----------------|
|              |                        | HeLa            | HT1080          | NKE-hTERT       | HaCaT           |
| Sanguinarine | Applied concentrations | 0.16            | 0.16            | 0.16            | 0.16            |
|              | IC <sub>20</sub>       | 0.54 $\pm$ 0.09 | 0.32 $\pm$ 0.04 | 0.73 $\pm$ 0.06 | 0.54 $\pm$ 0.05 |
|              | IC <sub>50</sub>       | 1.19 $\pm$ 0.08 | 0.69 $\pm$ 0.04 | 2.33 $\pm$ 0.19 | 1.50 $\pm$ 0.16 |
| Quercetin    | Applied concentrations | 8               | 8               | 8               | 8               |
|              | IC <sub>20</sub>       | 23 $\pm$ 12     | 19 $\pm$ 1      | 31 $\pm$ 5      | 56 $\pm$ 3      |
|              | IC <sub>50</sub>       | 47 $\pm$ 16     | 108 $\pm$ 6     | 109 $\pm$ 4     | 355 $\pm$ 76    |
| Kaempferol   | Applied concentrations | 4               | 4               | 32              | 4               |
|              | IC <sub>20</sub>       | 14 $\pm$ 1      | 11 $\pm$ 1      | 98 $\pm$ 8      | 13 $\pm$ 2      |
|              | IC <sub>50</sub>       | 73 $\pm$ 20     | 61 $\pm$ 1      | 382 $\pm$ 8     | 54 $\pm$ 3      |
| Thymoquinone | Applied concentrations | 14              | 14              | 14              | 3.5             |
|              | IC <sub>20</sub>       | 22 $\pm$ 1      | 20 $\pm$ 1      | 19 $\pm$ 1      | 9 $\pm$ 1       |
|              | IC <sub>50</sub>       | 38 $\pm$ 18     | 35 $\pm$ 13     | 61 $\pm$ 3      | 47 $\pm$ 3      |

**Figure S2.** Thiazole orange displacement from G4s by PSMs. Fluorescence intensity-concentration curves of all compounds.

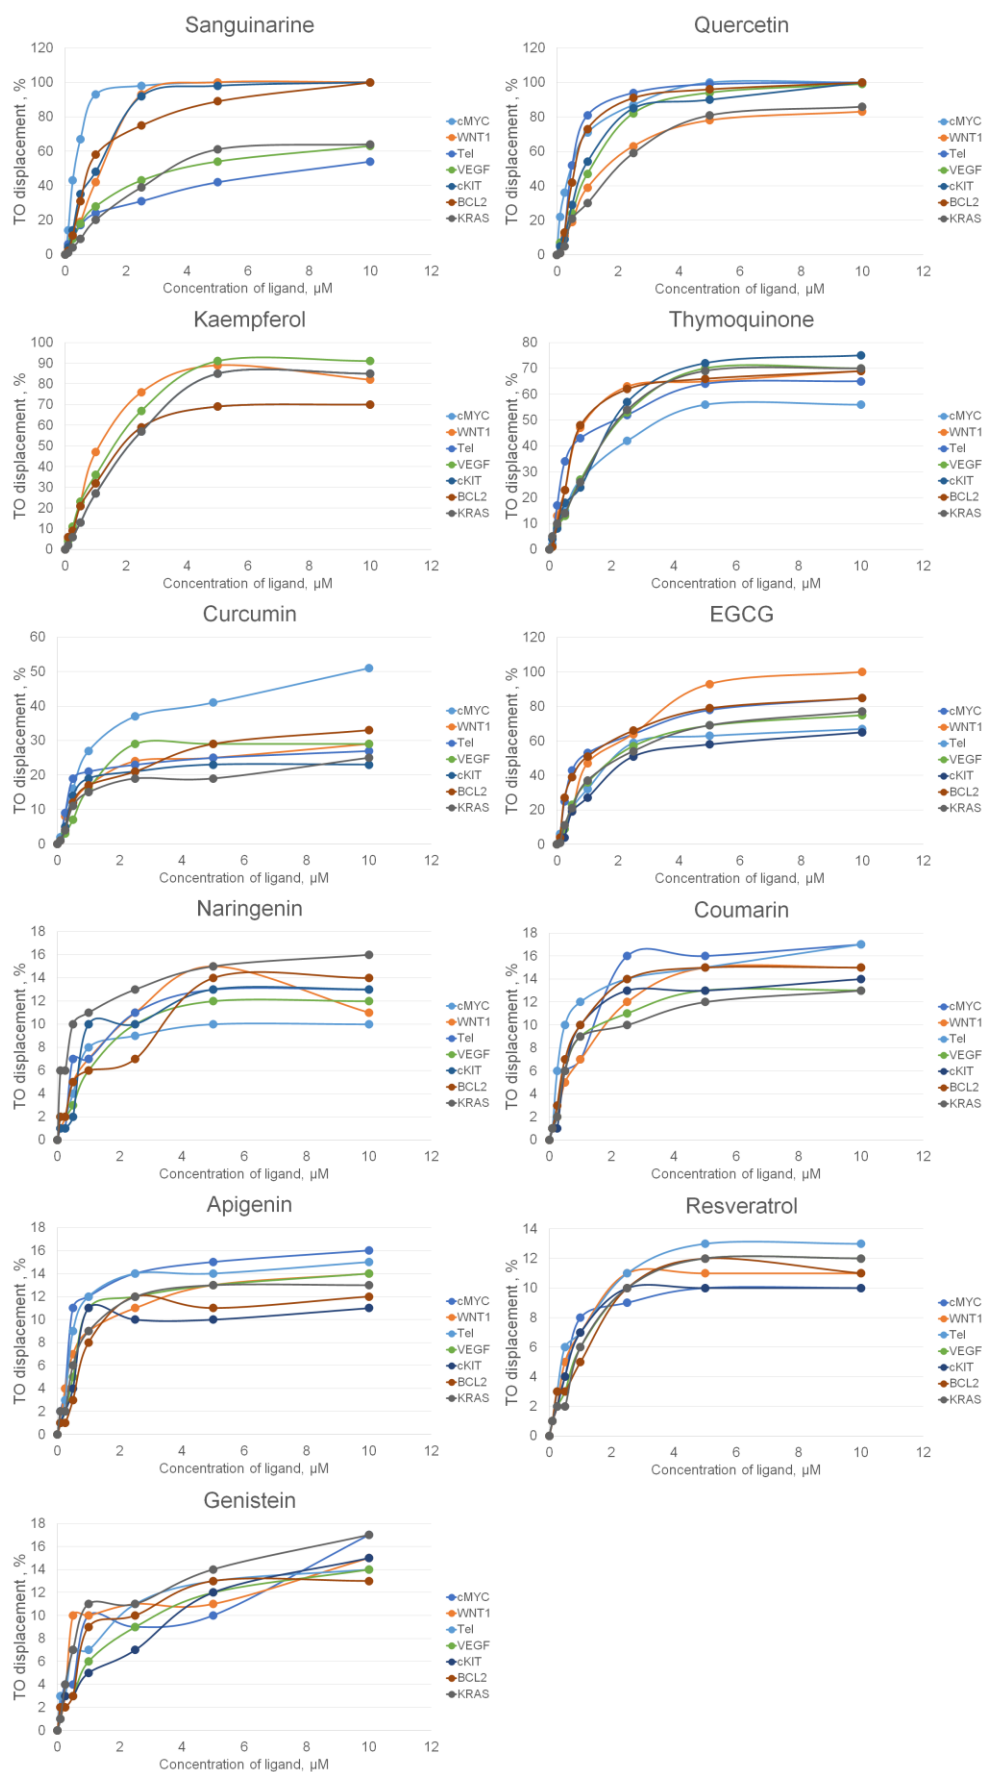

**Table S2.** Fluorescence data of the PSMs.

| Polyphenol   | Excitation | Emission | Laser voltage | Influence on the fluorescence of thiazole orange | Fluorescence |
|--------------|------------|----------|---------------|--------------------------------------------------|--------------|
| EGCG         | 328 nm     | 391 nm   | 900 v         | No influence                                     | Low level    |
| Resveratrol  | 319 nm     | 400 nm   | 900 v         | No influence                                     | High level   |
| Sanguinarine | 480 nm     | 600 nm   | 900 v         | No influence                                     | High level   |
| Thymoquinone | -          | -        | -             |                                                  | None         |
| Kaempferol   | -          | -        | -             |                                                  | None         |
| Genistein    | -          | -        | -             |                                                  | None         |
| Quercetin    | -          | -        | -             |                                                  | None         |
| Naringenin   | -          | -        | -             |                                                  | None         |
| Apigenin     | -          | -        | -             |                                                  | None         |
| Coumarin     | -          | -        | -             |                                                  | None         |
| Curcumin     | -          | -        | -             |                                                  | None         |

**Figure S3.** Fluorescence spectra of the PSMs.

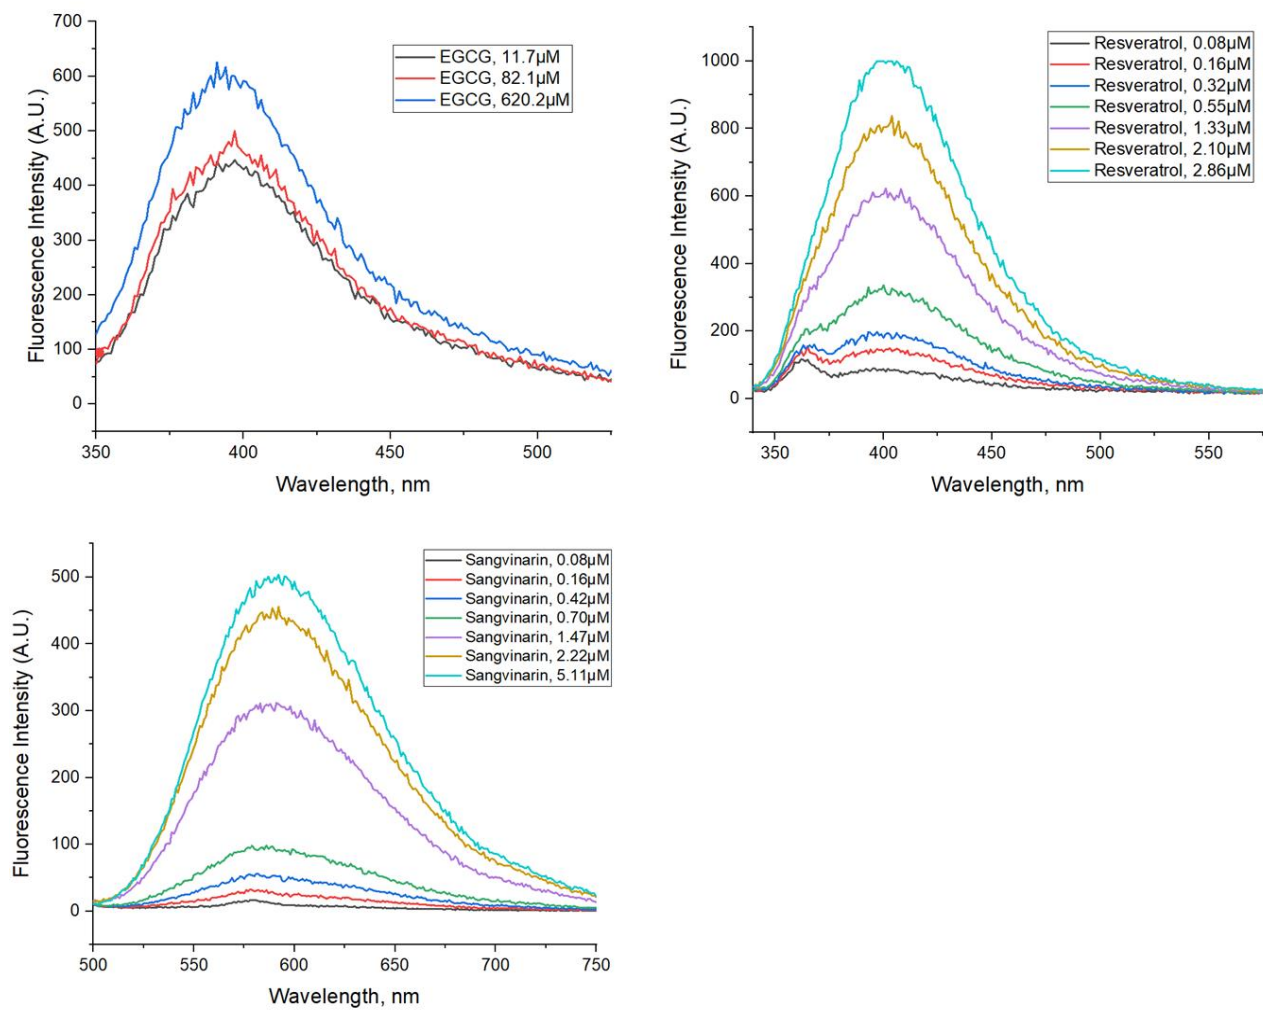

**Table S3.** Sanguinarine-induced expression changes in a set of target genes of signal pathways. Concentrations of PSMs are presented as  $\mu\text{M}$ .

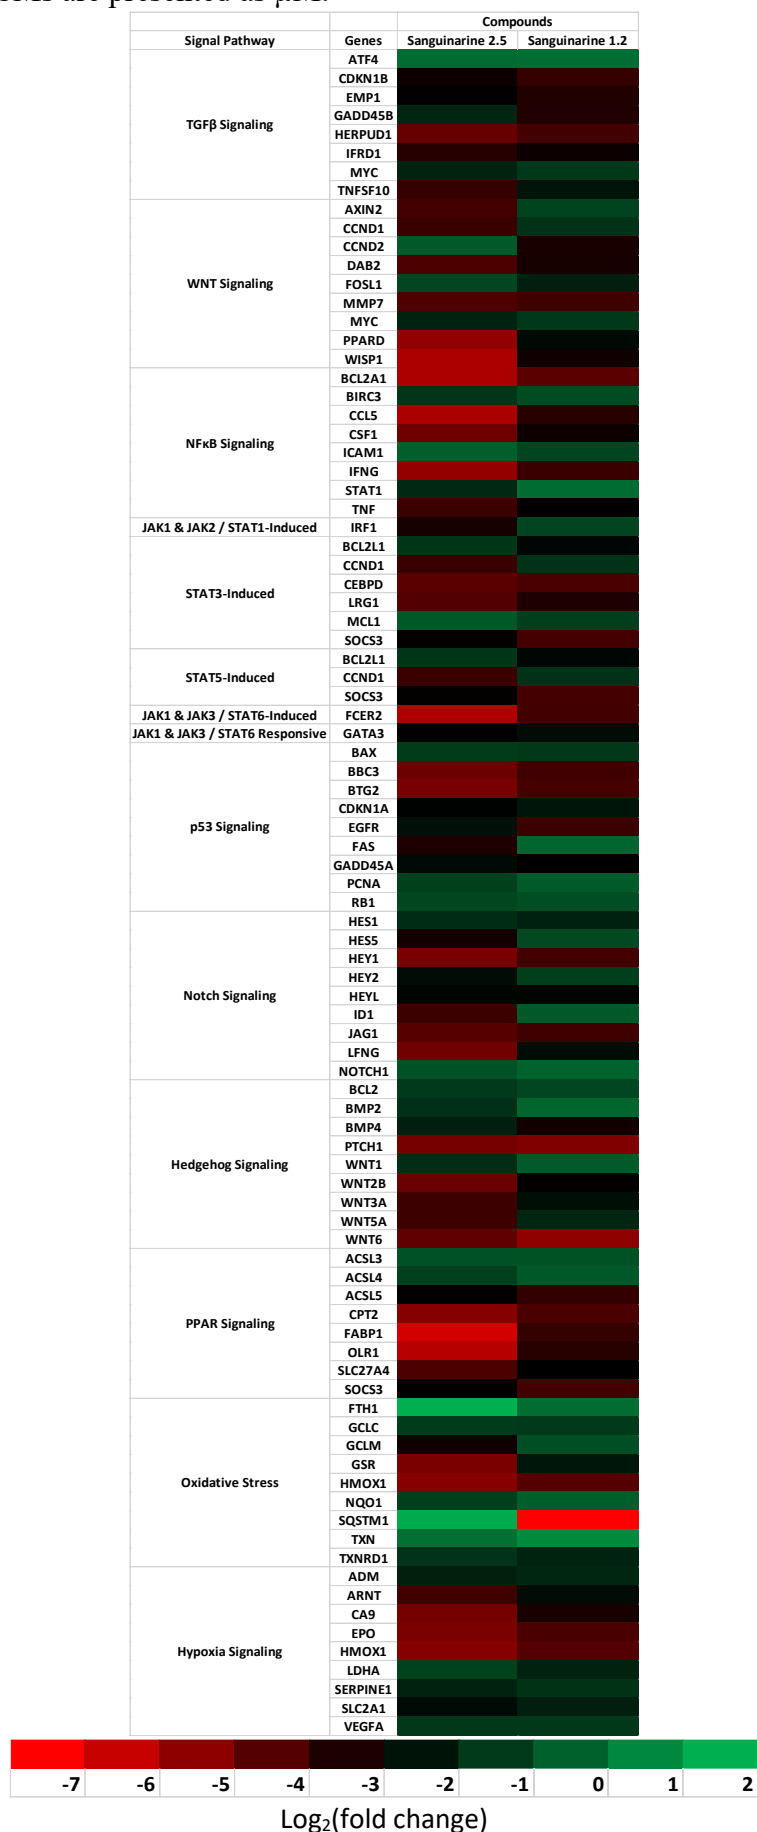

**Figure S4.** CD spectra of c-MYC G4 ( $\sim 4 \mu\text{M}$  oligonucleotide strand concentration) supplemented with 2 equivalent of kaempferol (A) or thymoquinone (B) and 1 equivalent of dsDNA. The measurements were carried out at room temperatures in buffer B.

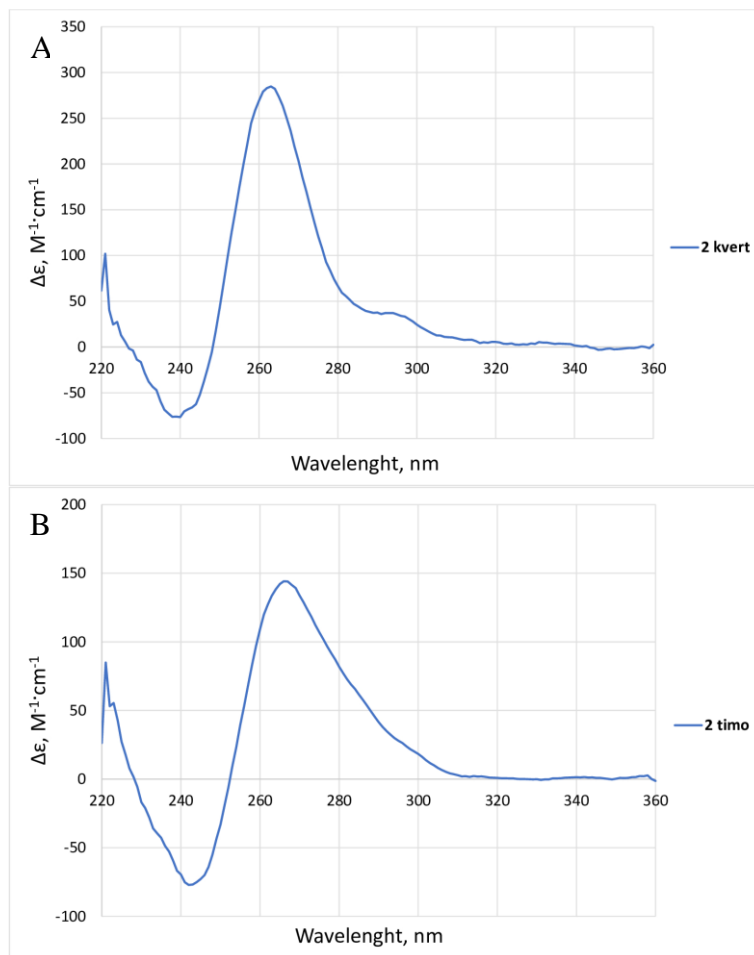

Supplement: s1 [file s1]
